# Supplementary material
Source: HighWire-hosted journal article supplement (https://jech.bmj.com/content/jech-2022-219213)
Supplement: inline-supplementary-material-1 [file inline-supplementary-material-1.pdf]

**eTable 1.** Linear regression detailing change in MVPA in restricted complete cases sample (n=3 209)

|                                         | Adjusted for sex and wear-time <sup>a</sup> |        | Adjusted for sex, wear-time, SEP <sup>b</sup> |        | Mutually-adjusted model <sup>c</sup> |        |
|-----------------------------------------|---------------------------------------------|--------|-----------------------------------------------|--------|--------------------------------------|--------|
| <b>PARENTAL OCCUPATIONAL CLASS</b>      |                                             |        |                                               |        |                                      |        |
| I Professional, II Managerial/Technical | Ref                                         |        | --                                            |        | Ref                                  |        |
| III Manual or Non-manual                | -3.17 (-5.34, -1.00)                        | <0.005 |                                               |        | -2.13 (-4.34, 0.07)                  | 0.10   |
| IV Partly skilled, V unskilled          | -4.36 (-7.19, -1.53)                        |        |                                               |        | -2.86 (-5.78, 0.05)                  |        |
| <b>PRE-NATAL MATERNAL RISK FACTORS</b>  |                                             |        |                                               |        |                                      |        |
| Maternal age at birth, per 1 year       | 0.34 (0.17, 0.51)                           | <0.001 | 0.31 (0.14, 0.48)                             | <0.001 | 0.28 (0.08, 0.48)                    | <0.01  |
| Previous pregnancies                    |                                             |        |                                               |        |                                      |        |
| 0                                       | Ref                                         |        | Ref                                           |        | Ref                                  |        |
| 1-2                                     | 1.14 (-0.77, 3.05)                          | 0.32   | 1.14 (-0.77, 3.04)                            | 0.25   | 0.51 (-1.48, 2.51)                   | 0.25   |
| 3+                                      | 1.88 (-0.86, 4.63)                          |        | 2.17 (-0.57, 4.91)                            |        | 0.55 (-2.59, 3.69)                   |        |
| Smoking during pregnancy                | -3.15 (-4.92, -1.37)                        | <0.001 | -2.84 (-4.63, -1.05)                          | <0.005 | -2.92 (-4.76, -1.09)                 | <0.005 |
| Clinical diabetes                       | -5.35 (-15.5, 4.83)                         | 0.30   | -5.32 (-15.49, 4.84)                          | 0.31   | -5.71 (-15.84, 4.42)                 | 0.27   |
| <b>POST-NATAL INFANT RISK FACTORS</b>   |                                             |        |                                               |        |                                      |        |
| Gestational age                         |                                             |        |                                               |        |                                      |        |
| <b>BOYS</b>                             |                                             |        |                                               |        |                                      |        |
| Pre-term (<37 weeks)                    | -2.23 (-8.73, 4.26)                         |        | -2.04 (-8.53, 4.45)                           |        | -3.49 (-10.27, 3.29)                 |        |
| Term (37-41 weeks)                      | Ref                                         | <0.005 | Ref                                           | <0.005 | Ref                                  | <0.005 |
| Post-term (>41 weeks)                   | -8.30 (-12.83, -3.77)                       |        | -8.00 (-12.53, -3.47)                         |        | -7.28 (-11.81, -2.76)                |        |
| <b>GIRLS</b>                            |                                             |        |                                               |        |                                      |        |
| Pre-term (<37 weeks)                    | -3.81 (-10.30, 2.67)                        |        | -2.91 (-16.15, 10.33)                         |        | -4.82 (-11.53, 1.88)                 |        |
| Term (37-41 weeks)                      | Ref                                         | 0.35   | Ref                                           | 0.42   | Ref                                  | 0.65   |
| Post-term (>41 weeks)                   | -1.71 (-5.59, 2.17)                         |        | -1.59 (-11.40, 8.21)                          |        | -1.00 (-4.88, 2.88)                  |        |
| Birth weight, per 1kg                   | -1.25 (-2.96, 0.46) <sup>d</sup>            | 0.15   | -1.38 (-3.09, 0.33) <sup>e</sup>              | 0.11   | -2.61 (-4.47, -0.74)                 | <0.01  |
| Breastfeeding >3months, n(%)            | 2.91 (0.39, 5.43)                           | 0.02   | 2.36 (-0.19, 4.90)                            | 0.07   | 1.62 (-0.93, 4.18)                   | 0.21   |
| Infant health concerns, n(%)            |                                             |        |                                               |        |                                      |        |
| 0                                       | Ref                                         |        | Ref                                           |        | Ref                                  |        |
| 1                                       | 0.08 (-2.12, 2.27)                          | 0.61   | 0.13 (-2.07, 2.32)                            | 0.67   | -0.27 (-2.49, 1.95)                  | 0.57   |
| 2+                                      | -2.27 (-6.83, 2.29)                         |        | -2.03 (-6.59, 2.52)                           |        | -2.53 (-7.23, 2.17)                  |        |

<sup>a</sup> 9 individual models, each adjusted for sex and wear time

<sup>b</sup> 8 individual models, each adjusted for sex, wear time and paternal occupational class

<sup>c</sup> A single combined model including sex, wear time, paternal occupational class, maternal age at birth, previous pregnancies, maternal smoking during pregnancy, maternal clinical diabetes, gestational age, standardised birth weight, breastfeeding and infant health concerns

<sup>d</sup> Estimate for birth weight in model adjusted for sex and gestational age: -1.57 (-3.39, 0.24); p=0.09

<sup>e</sup> Estimate for birth weight in model adjusted for sex, wear time, SEP and gestational age: -1.69 (-3.50, 0.12); p=0.07

**eTable 2.** Comparison of pre- and post-natal factors between the analytical sample (n=5 011), those who participated in age 46 data collection but did not have MVPA data (n=3 570) and those who were lost to follow-up before age 46 (n=9 425)

|                                          | Analytical sample<br>(n=5 011) | Participated in age 46 data collection but no MVPA data<br>(n=3 570) | Lost to follow-up before age 46<br>(n=9 425) |
|------------------------------------------|--------------------------------|----------------------------------------------------------------------|----------------------------------------------|
| <b>SEX, n(%)</b>                         |                                |                                                                      |                                              |
| Male                                     | 2396 (47.8)                    | 1762 (49.4)                                                          | 5087 (55.1)                                  |
| Female                                   | 2615 (52.2)                    | 1808 (50.6)                                                          | 4147 (44.9)                                  |
| <b>PARENTAL OCCUPATIONAL CLASS, n(%)</b> |                                |                                                                      |                                              |
| I Professional, II Managerial/Technical  | 999 (21.6)                     | 683 (20.7)                                                           | 1428 (15.6)                                  |
| III Manual or Non-manual                 | 2730 (59.1)                    | 1966 (59.7)                                                          | 5245 (57.3)                                  |
| IV Partly skilled, V unskilled           | 891 (19.3)                     | 645 (19.6)                                                           | 2474 (27.1)                                  |
| <b>PRE-NATAL MATERNAL RISK FACTORS</b>   |                                |                                                                      |                                              |
| Age at birth, mean $\pm$ SD              | 26.0 $\pm$ 5.3                 | 25.9 $\pm$ 5.4                                                       | 26.0 $\pm$ 5.7                               |
| Previous pregnancies, n(%)               |                                |                                                                      |                                              |
| 0                                        | 1707 (36.8)                    | 1138 (34.4)                                                          | 2975 (32.2)                                  |
| 1-2                                      | 2264 (48.7)                    | 1609 (48.7)                                                          | 4283 (46.3)                                  |
| 3+                                       | 674 (14.5)                     | 559 (16.9)                                                           | 1987 (21.5)                                  |
| Smoking during pregnancies, n(%)         | 1986 (43.0)                    | 1443 (43.9)                                                          | 4470 (48.6)                                  |
| Clinical diabetes, n (%)                 | 39 (0.9)                       | 26 (0.8)                                                             | 65 (0.7)                                     |
| <b>POST-NATAL INFANT RISK FACTORS</b>    |                                |                                                                      |                                              |
| Gestational age: males, n(%)             |                                |                                                                      |                                              |
| Pre-term (<37 weeks)                     | 73 (4.0)                       | 70 (5.2)                                                             | 315 (8.1)                                    |
| Term (37-41 weeks)                       | 1586 (87.5)                    | 1138 (84.7)                                                          | 3184 (81.8)                                  |
| Post-term (>41 weeks)                    | 154 (8.5)                      | 135 (10.1)                                                           | 393 (10.1)                                   |
| Gestational age: females, n(%)           |                                |                                                                      |                                              |
| Pre-term (<37 weeks)                     | 79 (3.9)                       | 51 (3.7)                                                             | 225 (7.1)                                    |
| Term (37-41 weeks)                       | 1736 (86.1)                    | 1195 (85.6)                                                          | 2628 (83.1)                                  |
| Post-term (>41 weeks)                    | 201 (10.0)                     | 146 (10.5)                                                           | 309 (9.8)                                    |
| Birth weight (g), mean $\pm$ SD          |                                |                                                                      |                                              |
| Males                                    | 3382 $\pm$ 534                 | 3361 $\pm$ 522                                                       | 3282 $\pm$ 0.65                              |
| Females                                  | 3255 $\pm$ 498                 | 3257 $\pm$ 514                                                       | 3168 $\pm$ 598                               |
| Breastfeeding >3months, n(%)             | 553 (13.5)                     | 349 (12.2)                                                           | 510 (8.5)                                    |
| Infant health concerns, n(%)             |                                |                                                                      |                                              |
| 0                                        | 3468 (75.7)                    | 2432 (74.6)                                                          | 6555 (74.1)                                  |
| 1                                        | 919 (20.1)                     | 687 (21.1)                                                           | 1803 (20.4)                                  |
| 2+                                       | 193 (4.2)                      | 143 (4.4)                                                            | 487 (5.51)                                   |

<sup>a</sup> N varies due to missing data in early life factors
